# Supplementary material for: In Vitro Study of Licorice on IL-1β-Induced Chondrocytes and In Silico Approach for Osteoarthritis
Source: MDPI journal article supplement (doi:10.3390/ph14121337), 2021-12-20
Supplement: s1 [file s1]

Table S1. Kaempferol and quercetin derivatives analysis of positive ES mode

| Component name                                                                          | Neutral mass (Da) | Observed neutral mass (Da) | Observed m/z | Total Fragments Found | Mass error (mDa) | Mass error (ppm) | Observed RT (min) | Detector counts | Response | Adducts |
|-----------------------------------------------------------------------------------------|-------------------|----------------------------|--------------|-----------------------|------------------|------------------|-------------------|-----------------|----------|---------|
| 8-C-Prenylkaempferol                                                                    | 354.1103          | 354.1113                   | 355.1186     | 19                    | 0.9              | 2.7              | 8.29              | 181862          | 150792   | +H      |
| 5-Methyl kaempferol                                                                     | 300.0634          | 300.0641                   | 301.0713     | 13                    | 0.7              | 2.2              | 6.45              | 57081           | 47251    | +H      |
| Kaempferol                                                                              | 286.0477          | 286.0481                   | 287.0554     | 7                     | 0.4              | 1.4              | 8.29              | 47583           | 40633    | +H      |
| Kaempferol-7-O- $\alpha$ -L-rhamnoside                                                  | 432.1056          | 432.1067                   | 433.1139     | 24                    | 1                | 2.3              | 4.07              | 38044           | 28688    | +H      |
| 5-Methyl kaempferol                                                                     | 300.0634          | 300.064                    | 301.0713     | 11                    | 0.6              | 2.1              | 4.64              | 19800           | 17016    | +H      |
| 5-Methyl kaempferol                                                                     | 300.0634          | 300.0639                   | 301.0712     | 44                    | 0.5              | 1.8              | 7.36              | 18287           | 15881    | +H      |
| 5-Methyl kaempferol                                                                     | 300.0634          | 300.0639                   | 301.0712     | 6                     | 0.5              | 1.8              | 4.55              | 18102           | 12327    | +H      |
| 5-Methyl kaempferol                                                                     | 300.0634          | 300.064                    | 301.0712     | 10                    | 0.6              | 1.9              | 7.43              | 14867           | 12000    | +H      |
| 8-C-Prenylkaempferol                                                                    | 354.1103          | 354.111                    | 355.1183     | 10                    | 0.7              | 1.8              | 7.51              | 13759           | 5295     | +H      |
| 8-C-Prenylkaempferol                                                                    | 354.1103          | 354.1095                   | 355.1168     | 15                    | -0.8             | -2.3             | 6.3               | 7146            | 4791     | +H      |
| 8-C-Prenylkaempferol                                                                    | 354.1103          | 354.1112                   | 355.1185     | 21                    | 0.8              | 2.4              | 5.83              | 6763            | 4679     | +H      |
| 8-C-Prenylkaempferol                                                                    | 354.1103          | 354.112                    | 355.1192     | 12                    | 1.6              | 4.6              | 6.07              | 6049            | 4838     | +H      |
| 8-C-Prenylkaempferol                                                                    | 354.1103          | 354.11                     | 355.1173     | 17                    | -0.3             | -1               | 6.76              | 4915            | 3822     | +H      |
| 8-C-Prenylkaempferol                                                                    | 354.1103          | 354.1104                   | 355.1176     | 21                    | 0                | 0.1              | 5.98              | 3346            | 3346     | +H      |
| Kaempferol                                                                              | 286.0477          | 286.0487                   | 287.0559     | 4                     | 0.9              | 3.2              | 8.58              | 2719            | 2351     | +H      |
| 8-C-Prenylkaempferol                                                                    | 354.1103          | 354.1117                   | 377.1009     | 33                    | 1.4              | 3.7              | 10.19             | 912             | 685      | +Na     |
| 8-C-Prenylkaempferol                                                                    | 354.1103          | 354.1097                   | 377.0989     | 35                    | -0.7             | -1.7             | 8.47              | 789             | 789      | +Na     |
| 5-Methyl kaempferol                                                                     | 300.0634          | 300.0628                   | 323.0521     | 10                    | -0.5             | -1.7             | 9.08              | 725             | 725      | +Na     |
| 8-C-Prenylkaempferol                                                                    | 354.1103          | 354.1101                   | 377.0993     | 79                    | -0.2             | -0.6             | 8.05              | 691             | 691      | +Na     |
| 8-C-Prenylkaempferol                                                                    | 354.1103          | 354.1116                   | 377.1008     | 18                    | 1.2              | 3.2              | 7.04              | 599             | 599      | +Na     |
| 8-C-Prenylkaempferol                                                                    | 354.1103          | 354.1119                   | 377.1011     | 7                     | 1.6              | 4.2              | 8.95              | 521             | 521      | +Na     |
| Quercetin-3,3'-dimethyl-ether                                                           | 330.074           | 330.0746                   | 331.0818     | 7                     | 0.6              | 1.9              | 7.31              | 23152           | 19058    | +H      |
| Quercetin-3',4',7-trimethyl ether                                                       | 328.0947          | 328.0958                   | 329.103      | 18                    | 1.1              | 3.3              | 7.05              | 5364            | 4393     | +H      |
| Quercetin 3,3'-dimethyl ether 7-rutinoside                                              | 638.1847          | 638.1875                   | 639.1948     | 14                    | 2.9              | 4.5              | 6.73              | 3653            | 2079     | +H      |
| Quercetin-3',4',7-trimethyl ether                                                       | 328.0947          | 328.0942                   | 329.1014     | 18                    | -0.5             | -1.6             | 8.02              | 2717            | 1650     | +H      |
| Quercetin-3-O- $\beta$ -D-xylopyranosyl (1 $\rightarrow$ 2)- $\beta$ -D-glucopyranoside | 596.1377          | 596.1388                   | 597.1461     | 0                     | 1.1              | 1.9              | 15.64             | 1647            | 804      | +H      |
| Quercetin-3',4',7-trimethyl ether                                                       | 328.0947          | 328.0953                   | 329.1025     | 8                     | 0.6              | 1.7              | 6.69              | 1310            | 726      | +H      |
| Quercetin-7-O-rutinoside                                                                | 610.1534          | 610.151                    | 611.1583     | 12                    | -2.4             | -3.9             | 3.19              | 844             | 844      | +H      |
| 3-O- $\beta$ -D-Galacopyanosyl quercetin                                                | 466.1111          | 466.1087                   | 489.0979     | 27                    | -2.4             | -4.9             | 0.59              | 526             | 526      | +Na     |
