# Supplementary material for: In Vitro Study of Licorice on IL-1β-Induced Chondrocytes and In Silico Approach for Osteoarthritis
Source: MDPI journal article supplement (doi:10.3390/ph14121337), 2021-12-20
Supplement: s1 [file s1]

Table S2. Kaempferol and quercetin derivatives analysis of negative ES mode

| Component name                                                    | Identification status | Neutral mass (Da) | Observed neutral mass (Da) | Observed m/z | Mass error (mDa) | Mass error (ppm) | Observed RT (min) | Detector counts | Response | Adducts |
|-------------------------------------------------------------------|-----------------------|-------------------|----------------------------|--------------|------------------|------------------|-------------------|-----------------|----------|---------|
| Dihydrokaempferol-5-O- $\beta$ -D-glucopyranoside                 | Identified            | 450.11621         | 450.1154                   | 449.1081     | -0.8             | -1.8             | 4.39              | 217726          | 1690     | -H      |
| 8-C-Prenylkaempferol                                              | Identified            | 354.11034         | 354.1117                   | 353.1045     | 1.4              | 4                | 9.28              | 171237          | 135154   | -H      |
| Kaempferol 3-Lathyroside                                          | Identified            | 580.14282         | 580.1452                   | 579.1379     | 2.4              | 4.1              | 6.18              | 134803          | 1543     | -H      |
| 8-C-Prenylkaempferol                                              | Identified            | 354.11034         | 354.1103                   | 399.1085     | 0                | 0                | 5.78              | 125081          | 99034    | +HCOO   |
| 7-O- $\beta$ -D-Glucopyrano-syl-kaempferol                        | Identified            | 448.10056         | 448.1004                   | 447.0931     | -0.1             | -0.3             | 4.22              | 86352           | 4198     | -H      |
| Dihydrokaempferol-5-O- $\beta$ -D-glucopyranoside                 | Identified            | 450.11621         | 450.1159                   | 449.1086     | -0.3             | -0.7             | 3.91              | 82813           | 28707    | -H      |
| 8-C-Prenylkaempferol                                              | Identified            | 354.11034         | 354.1118                   | 353.1045     | 1.4              | 4.1              | 9.39              | 77811           | 57802    | -H      |
| Kaempferol-3-O-(2G- $\alpha$ -L-rhamnosyl)-rutinoside             | Identified            | 740.21638         | 740.2151                   | 739.2079     | -1.2             | -1.7             | 3.63              | 76180           | 18517    | -H      |
| 8-C-Prenylkaempferol                                              | Identified            | 354.11034         | 354.11                     | 399.1082     | -0.3             | -0.8             | 5.5               | 73394           | 17399    | +HCOO   |
| 8-C-Prenylkaempferol                                              | Identified            | 354.11034         | 354.1117                   | 353.1044     | 1.4              | 3.9              | 9.75              | 65674           | 65674    | -H      |
| Resokaempferol                                                    | Identified            | 270.05282         | 270.0534                   | 269.0461     | 0.5              | 2                | 5.8               | 56153           | 37622    | -H      |
| Kaempferol 3-apioside-7-rhamnosyl-(1 $\rightarrow$ 6)-galactoside | Identified            | 726.20073         | 726.2015                   | 725.1942     | 0.7              | 1                | 3.96              | 43132           | 12220    | -H      |
| 5-Methyl kaempferol                                               | Identified            | 300.06339         | 300.0639                   | 299.0566     | 0.5              | 1.8              | 5.98              | 38257           | 30117    | -H      |
| Dihydrokaempferol-5-O- $\beta$ -D-glucopyranoside                 | Identified            | 450.11621         | 450.1166                   | 449.1093     | 0.4              | 0.9              | 3.65              | 36040           | 21538    | -H      |
| 8-C-Prenylkaempferol                                              | Identified            | 354.11034         | 354.1108                   | 399.109      | 0.5              | 1.2              | 5.91              | 30575           | 9139     | +HCOO   |
| Kaempferol 3-apioside-7-rhamnosyl-(1 $\rightarrow$ 6)-galactoside | Identified            | 726.20073         | 726.1982                   | 725.191      | -2.5             | -3.4             | 5.06              | 30546           | 5249     | -H      |
| Kaempferol 3-O- $\beta$ -D-glucuronopyranosyl methyl ester        | Identified            | 476.09548         | 476.0948                   | 475.0875     | -0.7             | -1.4             | 3.53              | 27108           | 5460     | -H      |
| 8-C-Prenylkaempferol                                              | Identified            | 354.11034         | 354.1108                   | 353.1036     | 0.5              | 1.4              | 8.16              | 26468           | 7645     | -H      |
| 8-C-Prenylkaempferol                                              | Identified            | 354.11034         | 354.1109                   | 353.1036     | 0.5              | 1.5              | 8.04              | 25656           | 13225    | -H      |
| 8-C-Prenylkaempferol                                              | Identified            | 354.11034         | 354.111                    | 399.1092     | 0.6              | 1.6              | 6.73              | 23195           | 13672    | +HCOO   |
| Kaempferol-3-Glucoside-3''-p-coumaroyl                            | Identified            | 580.15808         | 580.1594                   | 579.1521     | 1.3              | 2.3              | 3.84              | 20847           | 13247    | -H      |

|                                                                                                                   |            |           |          |          |      |      |       |        |       |       |
|-------------------------------------------------------------------------------------------------------------------|------------|-----------|----------|----------|------|------|-------|--------|-------|-------|
| Kaempferol-7-O- $\alpha$ -L-arabinofuranoside                                                                     | Identified | 418.09    | 418.0912 | 417.0839 | 1.2  | 2.9  | 3.92  | 19856  | 18406 | -H    |
| Dihydrokaempferol-5-O- $\beta$ -D-glucopyranoside                                                                 | Identified | 450.11621 | 450.1177 | 449.1104 | 1.5  | 3.3  | 3.42  | 17576  | 3547  | -H    |
| 8-C-Prenylkaempferol                                                                                              | Identified | 354.11034 | 354.1102 | 399.1084 | -0.1 | -0.3 | 5.09  | 17195  | 7171  | +HCOO |
| 5-Methyl kaempferol                                                                                               | Identified | 300.06339 | 300.0636 | 299.0563 | 0.2  | 0.8  | 6.32  | 15880  | 6794  | -H    |
| 8-C-Prenylkaempferol                                                                                              | Identified | 354.11034 | 354.1106 | 399.1088 | 0.2  | 0.6  | 6.23  | 15747  | 13713 | +HCOO |
| 8-C-Prenylkaempferol                                                                                              | Identified | 354.11034 | 354.1099 | 353.1027 | -0.4 | -1.2 | 7.16  | 14607  | 6841  | -H    |
| 8-C-Prenylkaempferol                                                                                              | Identified | 354.11034 | 354.1094 | 399.1076 | -0.9 | -2.3 | 4.23  | 14127  | 10111 | +HCOO |
| Kaempferol-3-glucuronide                                                                                          | Identified | 464.09548 | 464.0947 | 463.0874 | -0.8 | -1.7 | 8.55  | 11747  | 976   | -H    |
| 7-O- $\beta$ -D-Glucopyrano-syl-kaempferol                                                                        | Identified | 448.10056 | 448.1018 | 447.0945 | 1.2  | 2.8  | 4.02  | 9188   | 4477  | -H    |
| Kaempferol-3-Glucoside-3''-p-coumaroyl                                                                            | Identified | 580.15808 | 580.16   | 625.1582 | 1.9  | 3.1  | 2.58  | 8924   | 3732  | +HCOO |
| Dihydrokaempferol-5-O- $\beta$ -D-glucopyranoside                                                                 | Identified | 450.11621 | 450.1174 | 449.1102 | 1.2  | 2.7  | 5     | 6082   | 4356  | -H    |
| 7- $\alpha$ -L-Rhamnosyl kaempferol 3-O- $\beta$ -D-glucopyranosyl(1 $\rightarrow$ 6)- $\beta$ -D-glucopyranoside | Identified | 756.21129 | 756.2127 | 755.2054 | 1.4  | 1.9  | 10.24 | 4036   | 1693  | -H    |
| Kaempferol                                                                                                        | Identified | 286.04774 | 286.0465 | 285.0392 | -1.3 | -4.4 | 4.75  | 3921   | 3219  | -H    |
| 7- $\alpha$ -L-Rhamnosyl kaempferol 3-O- $\beta$ -D-glucopyranosyl(1 $\rightarrow$ 6)- $\beta$ -D-glucopyranoside | Identified | 756.21129 | 756.2124 | 755.2052 | 1.1  | 1.5  | 8.05  | 2808   | 1173  | -H    |
| Dihydrokaempferol-5-O- $\beta$ -D-glucopyranoside                                                                 | Identified | 450.11621 | 450.1148 | 449.1075 | -1.5 | -3.2 | 6.7   | 2726   | 1295  | -H    |
| Dihydrokaempferol                                                                                                 | Identified | 288.06339 | 288.0621 | 287.0548 | -1.3 | -4.6 | 5.98  | 2557   | 2125  | -H    |
| Kaempferol-3-O-(2G- $\alpha$ -L-rhamnosyl)-rutinoside                                                             | Identified | 740.21638 | 740.2188 | 739.2115 | 2.4  | 3.2  | 7.69  | 1880   | 1880  | -H    |
| Kaempferol-3-Glucoside-2''-p-coumaroyl                                                                            | Identified | 594.13734 | 594.1364 | 639.1346 | -0.9 | -1.4 | 6.27  | 1380   | 1380  | +HCOO |
| Quercetin 3,3'-dimethyl ether 7-rutinoside                                                                        | Identified | 638.18469 | 638.184  | 637.1767 | -0.7 | -1.1 | 5     | 662025 | 11556 | -H    |
| Quercetin-3-O-(2G- $\alpha$ -L-rhamnosyl)-rutinoside                                                              | Identified | 756.21129 | 756.2126 | 755.2054 | 1.3  | 1.8  | 3.41  | 132720 | 11096 | -H    |

|                                                      |            |           |          |          |      |      |      |        |      |       |
|------------------------------------------------------|------------|-----------|----------|----------|------|------|------|--------|------|-------|
| Quercetin 3,3'-dimethyl ether 7-rutinoside           | Identified | 638.18469 | 638.1864 | 683.1846 | 1.7  | 2.5  | 5.42 | 106550 | 4438 | +HCOO |
| Quercetin 3,3'-dimethyl ether 7-rutinoside           | Identified | 638.18469 | 638.1853 | 637.178  | 0.6  | 1    | 5.16 | 103403 | 4692 | -H    |
| Quercetin 3,3'-dimethyl ether 7-rutinoside           | Identified | 638.18469 | 638.1842 | 637.1769 | -0.5 | -0.8 | 5.56 | 59327  | 3191 | -H    |
| Quercetin 3,3'-dimethyl ether 7-rutinoside           | Identified | 638.18469 | 638.1848 | 637.1775 | 0.1  | 0.2  | 4.87 | 32299  | 5944 | -H    |
| Quercetin 3,3'-dimethyl ether 7-rutinoside           | Identified | 638.18469 | 638.1842 | 683.1824 | -0.5 | -0.7 | 5.63 | 28299  | 4883 | +HCOO |
| Quercetin 3,3'-dimethyl ether 7-rutinoside           | Identified | 638.18469 | 638.1868 | 683.185  | 2.1  | 3.1  | 2.7  | 22976  | 6705 | +HCOO |
| Quercetin-7-O-rutinoside                             | Identified | 610.15338 | 610.1539 | 609.1467 | 0.5  | 0.9  | 4.45 | 13307  | 7495 | -H    |
| Quercetin 3-O-neohesperidoside                       | Identified | 610.15338 | 610.1564 | 609.1491 | 3    | 5    | 3.55 | 12035  | 7526 | -H    |
| Quercetin 3,3'-dimethyl ether 7-rutinoside           | Identified | 638.18469 | 638.1821 | 637.1748 | -2.6 | -4.1 | 4.45 | 5716   | 3674 | -H    |
| Quercetin-3-O-(2G- $\alpha$ -L-rhamnosyl)-rutinoside | Identified | 756.21129 | 756.2079 | 801.2061 | -3.4 | -4.3 | 9.14 | 1219   | 1219 | +HCOO |
